# Supplementary material for: Early Detection of Wireworm (Coleoptera: Elateridae) Infestation and Drought Stress in Maize Using Hyperspectral Imaging
Source: MDPI journal article supplement (doi:10.3390/agronomy13010178), 2023-01-05
Supplement: s1 [file s1]

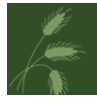

**Table S1.** Eigenvalues and proportion of variance of each principal component for various physiological and morphological traits in maize plants of different hybrids (ZP341 vs. FuturiXX), in different water regimes (water deficient vs. well-watered) and subjected to herbivory (no wireworms vs. wireworm infested).

| PHYSIOLOGY DAY 14 |            |                                      |                         | PHYSIOLOGY DAY 21 |                                      |                         | PHYSIOLOGY DAY 28 |                                      |                         | MORPHOLOGY |                                      |                         |
|-------------------|------------|--------------------------------------|-------------------------|-------------------|--------------------------------------|-------------------------|-------------------|--------------------------------------|-------------------------|------------|--------------------------------------|-------------------------|
|                   | Eigenvalue | Proportion of variance explained (%) | Cumulative variance (%) | Eigenvalue        | Proportion of variance explained (%) | Cumulative variance (%) | Eigenvalue        | Proportion of variance explained (%) | Cumulative variance (%) | Eigenvalue | Proportion of variance explained (%) | Cumulative variance (%) |
| PC1               | 3.21       | 53.52                                | 53.52                   | 4.26              | 71.03                                | 71.03                   | 3.21              | 53.52                                | 53.52                   | 2.57       | 64.23                                | 64.23                   |
| PC2               | 1.46       | 24.45                                | 77.97                   | 0.83              | 13.93                                | 84.96                   | 1.47              | 24.45                                | 77.97                   | 0.71       | 17.84                                | 82.08                   |
| PC3               | 0.80       | 13.29                                | 91.26                   | 0.60              | 9.97                                 | 94.93                   | 0.80              | 13.29                                | 91.26                   | 0.54       | 13.42                                | 95.50                   |
| PC4               | 0.34       | 5.71                                 | 96.96                   | 0.21              | 3.51                                 | 98.44                   | 0.34              | 5.71                                 | 96.96                   | 0.18       | 4.50                                 | 100.00                  |
| PC5               | 0.11       | 1.77                                 | 98.73                   | 0.08              | 1.41                                 | 99.85                   | 0.11              | 1.77                                 | 98.73                   | /          | /                                    | /                       |
| PC6               | 0.08       | 1.27                                 | 100.00                  | 0.01              | 0.15                                 | 100.00                  | 0.08              | 1.27                                 | 100.00                  | /          | /                                    | /                       |

**Table S2.** PERMANOVA results for the overall effect of water regime, presence of pest and hybrid on a) maize physiological data in three time points, and b) maize morphology data. Df - degrees of freedom; SumsSqs - sum of squares; MeanSqs – meansum of squares; \* Asterisk indicates statistical significance with  $P < 0.05$ , P-values based on 999 permutations (lowest P-value possible 0.001).

a)

|                     | DAY 14 |         |         |        |        | DAY 21 |         |         |        |         | DAY 28 |         |         |        |       |
|---------------------|--------|---------|---------|--------|--------|--------|---------|---------|--------|---------|--------|---------|---------|--------|-------|
|                     | Df     | SumsSqs | MeanSqs | F      | P      | Df     | SumsSqs | MeanSqs | F      | P       | Df     | SumsSqs | MeanSqs | F      | P     |
| drought             | 1      | 156.2   | 156.17  | 1.258  | 0.294  | 1      | 511.3   | 511.26  | 6.1869 | 0.007** | 1      | 122.8   | 122.832 | 1.1316 | 0.297 |
| pest                | 1      | 107.8   | 107.76  | 0.868  | 0.445  | 1      | 622.8   | 622.84  | 7.5373 | 0.003** | 1      | 176.2   | 176.207 | 1.6233 | 0.199 |
| hybrid              | 1      | 498.7   | 498.67  | 4.0166 | 0.021* | 1      | 432.4   | 432.38  | 5.2324 | 0.01**  | 1      | 258.5   | 258.533 | 2.3818 | 0.073 |
| drought:pest        | 1      | 67.8    | 67.79   | 0.546  | 0.668  | 1      | 120.3   | 120.31  | 1.4559 | 0.23    | 1      | 38.3    | 38.303  | 0.3529 | 0.773 |
| drought:hybrid      | 1      | 38.3    | 38.33   | 0.3087 | 0.801  | 1      | 46.5    | 46.48   | 0.5625 | 0.601   | 1      | 19.2    | 19.151  | 0.1764 | 0.897 |
| pest:hybrid         | 1      | 78.1    | 78.14   | 0.6294 | 0.565  | 1      | 50      | 49.98   | 0.6048 | 0.592   | 1      | 7.9     | 7.932   | 0.0731 | 0.956 |
| drought:pest:hybrid | 1      | 41.8    | 41.85   | 0.3371 | 0.778  | 1      | 215.5   | 215.52  | 2.6081 | 0.077   | 1      | 65.5    | 65.541  | 0.6038 | 0.618 |

|           |    |        |        |        |    |        |       |        |    |        |         |       |
|-----------|----|--------|--------|--------|----|--------|-------|--------|----|--------|---------|-------|
| Residuals | 24 | 2979.6 | 124.15 | 0.7509 | 24 | 1983.2 | 82.64 | 0.4981 | 24 | 2605.1 | 108.546 | 0.791 |
| Total     | 31 | 3968.3 | 1      |        | 31 | 3982   | 1     |        | 31 | 3293.6 | 1       |       |

b)

|                   | Df | SumsSqs | MeanSqs | F       | P        |
|-------------------|----|---------|---------|---------|----------|
| Water             | 1  | 440.15  | 440.15  | 38.969  | 0.001*** |
| Pest              | 1  | 346.79  | 346.79  | 30.703  | 0.001*** |
| Hybrid            | 1  | 154.1   | 154.1   | 13.644  | 0.001*** |
| Water:Pest        | 1  | 44.35   | 44.35   | 3.927   | 0.032*   |
| Water:Hybrid      | 1  | 23.15   | 23.15   | 2.049   | 0.134    |
| Pest:Hybrid       | 1  | 7.19    | 7.19    | 0.637   | 0.437    |
| Water:Pest:Hybrid | 1  | 52.35   | 52.35   | 4.635   | 0.029*   |
| Residuals         | 48 | 542.15  | 11.29   | 0.33669 |          |
| Total             | 55 | 1610.24 | 1       |         |          |
